# Supplementary material
Source: MDPI journal article supplement (https://www.mdpi.com/2571-8800/2/3/22)
Supplement: s1 [file s1]

# Supplementary Materials: The Unique Immunoregulatory Function of *Staphylococcus Aureus* Lipoteichoic Acid in Dendritic Cells

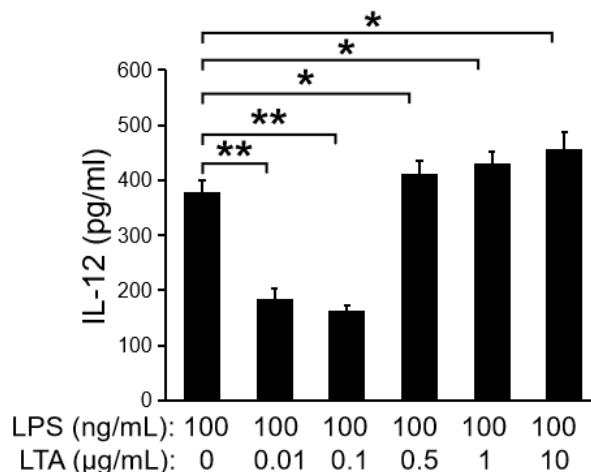

**Figure 1.** IL-12 production from BMDC was suppressed by LTA with dose dependent manner. BMDCs were stimulated with LPS (100 ng/mL). The some cultures were costimulated with LTA (0.01–10 µg/mL). After 24 h of the treatment, cultured medium was harvested, then IL-12 production was measured by ELISA. The data are pooled from three independent experiments. The Student's *t*-test was used to analyze data for significant differences. Values of \*  $p < 0.05$  and \*\*  $p < 0.01$  were regarded as significant.

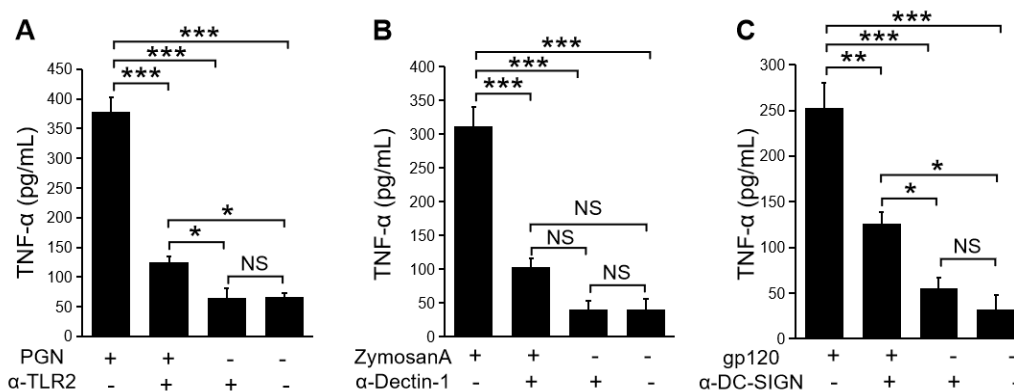

**Figure 2.** The efficiency of TLR2, Dectin-1 and DC-SIGN blocking antibodies. A–C) The efficiency of blocking antibody was evaluated with ligand stimulation in BMDC. The BMDs were simulated with PGN (for TLR2) (A), ZymosanA (for Dectin-1) and HIVgp120 (for DC-SIGN) combined with blocking antibody for each receptor. The cells were incubated at 37°C for 24h, then the cultured medium was harvested for cytokine measurement by ELISA. The data are pooled from three independent experiments. The Student's *t*-test was used to analyze data for significant differences. Values of \*  $p < 0.05$ , \*\*  $p < 0.01$  and \*\*\*  $p < 0.001$  were regarded as significant.

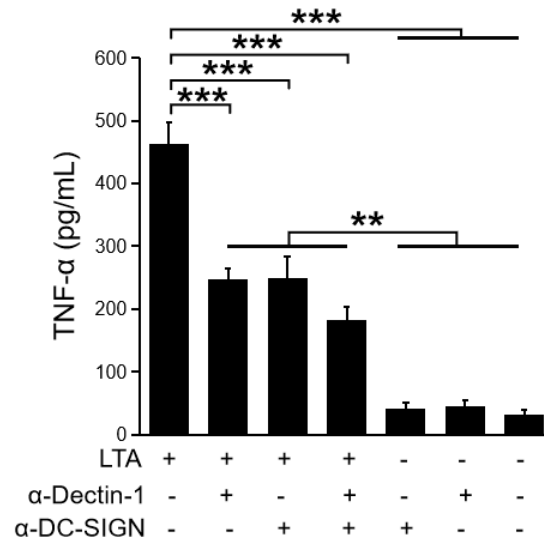

**Figure 3.** Cytokine production was dominantly suppressed by CLRs inhibition in BMDC. BMDC was stimulated with LTA (1 $\mu$ g/mL), and some cultures were treated with or without anti-CLR (Dectin-1 and DC-SIGN) mAb. The BMDCs were incubated at 37°C for 24h, then the cultured medium was harvested for cytokine measurement by ELISA. The data are pooled from three independent experiments. The Student's *t*-test was used to analyze data for significant differences. Values of \*  $p < 0.05$ , \*\*  $p < 0.01$  and \*\*\*  $p < 0.001$  were regarded as significant.
